# Supplementary material for: Lactic Acid Bacteria and Bacillus subtilis as Potential Protective Cultures for Biopreservation in the Food Industry
Source: MDPI journal article supplement (doi:10.3390/app14104016), 2024-05-09
Supplement: s1 [file s1]

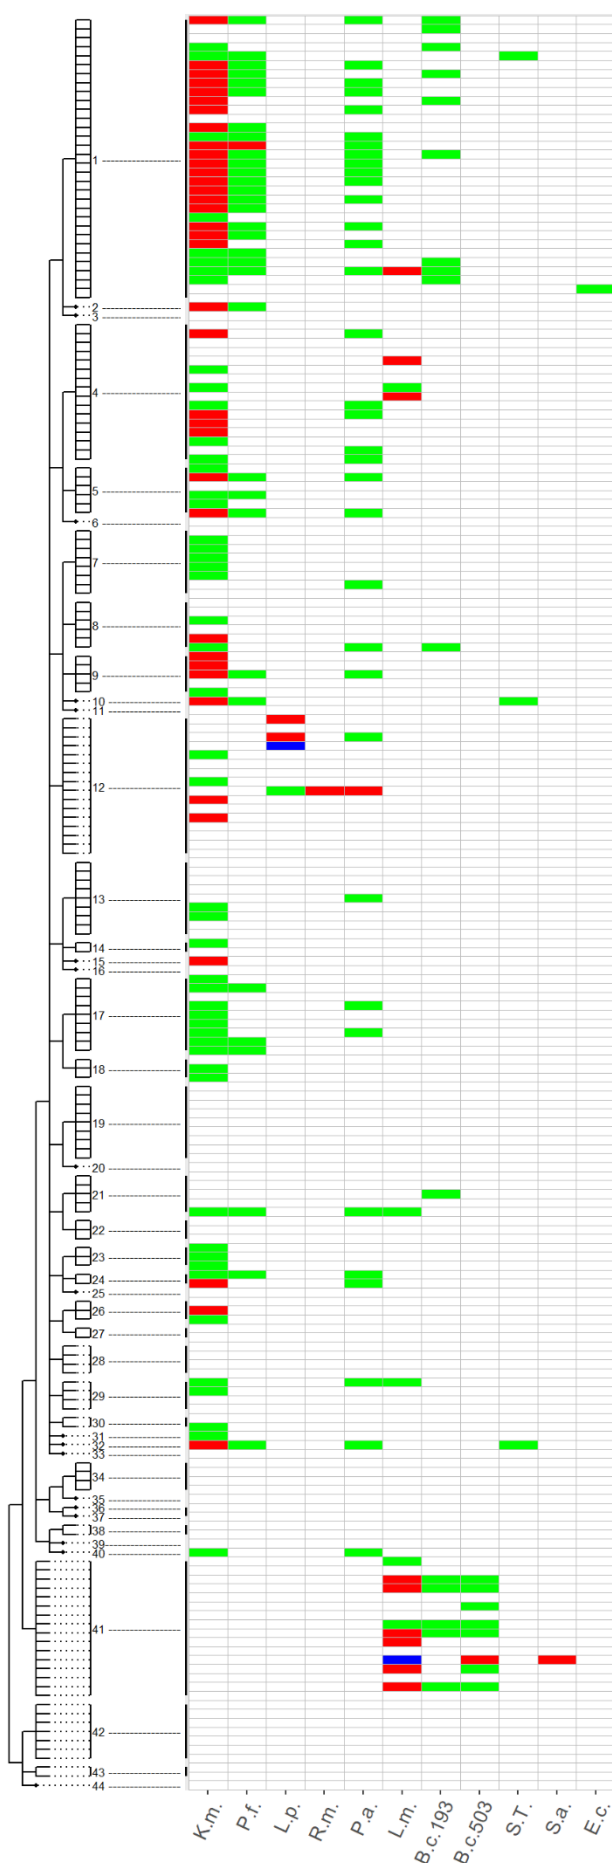

**Figure S1.** Depiction of the inhibition zone achieved by each tested culture-free supernatant, including the well diameter: < 9.2 mm (white), 9.2 mm ≤ inhibition zone < 15.0 mm (green), 15.0 mm ≤ inhibition zone < 25.0 mm (red), ≥ 25.0 mm (blue).

Tested bacterial species: K.m. = *Kluyveromyces marxianus* CNTA.1649, P.f. = *Pseudomonas fluorescens* CNTA 571, L.p. = *Lentilactobacillus parabuchneri* DSMZ 5987, R.m. = *Rothia mucilaginosa* DSMZ 18184, P.a. = *Pseudomonas aeruginosa* CECT 110T, L.m. = *Listeria monocytogenes* CECT 7467, B.c.193 = *Bacillus cereus* CECT 193, B.c.503 = *Bacillus cereus* CNTA 503, S.T. = *Salmonella* Typhimurium CECT 443, S.a. = *Staphylococcus aureus* CECT 976, E.c. = *Escherichia coli* DSMZ 19206.

A dendrogram showing the taxonomic hierarchical relationship between the different tested strains is also shown. 1 = *Lactiplantibacillus plantarum*, 2 = *Lactiplantibacillus pentosus*, 3 = *Lactiplantibacillus paraplantarum*, 4 = *Pediococcus acidilactici*, 5 = *Pediococcus pentosaceus*, 6 = *Pediococcus parvulus*, 7 = *Lacticaseibacillus paracasei*, 8 = *Lacticaseibacillus casei*, 9 = *Lacticaseibacillus rhamnosus*, 10 = *Lacticaseibacillus manihotivorans*, 11 = *Lacticaseibacillus saniviri*, 12 = *Levilactobacillus brevis*, 13 = *Leuconostoc mesenteroides*, 14 = *Leuconostoc pseudomenteroides*, 15 = *Leuconostoc citreum*, 16 = *Leuconostoc suiucom*, 17 = *Limosilactobacillus fermentum*, 18 = *Limosilactobacillus reuteri*, 19 = *Lentilactobacillus parabuchneri*, 20 = *Lentilactobacillus buchneri*, 21 = *Latilactobacillus curvatus*, 22 = *Latilactobacillus sakei*, 23 = *Lactobacillus delbrueckii*, 24 = *Lactobacillus johnsonii*, 25 = *Lactobacillus acidophilus*, 26 = *Weissella confusa*, 27 = *Weissella cibaria*, 28 = *Loigolactobacillus coryniformis*, 29 = *Companilactobacillus alimentarius*, 30 = *Liquorilactobacillus nagelii*, 31 = *Oenococcus oeni*, 32 = *Ligilactobacillus salivarius*, 33 = *Furfurilactobacillus rossiae*, 34 = *Streptococcus thermophilus*, 35 = *Streptococcus salivarius*, 36 = *Lactococcus lactis*, 37 = *Lactococcus cremoris*, 38 = *Enterococcus faecalis*, 39 = *Enterococcus faecium*, 40 = *Enterococcus mundtii*, 41 = *Bacillus subtilis*, 42 = *Bifidobacterium animalis* subsp. *lactis*, 43 = *Bifidobacterium pseudocatenulatum*, 44 = *Bifidobacterium longum*.

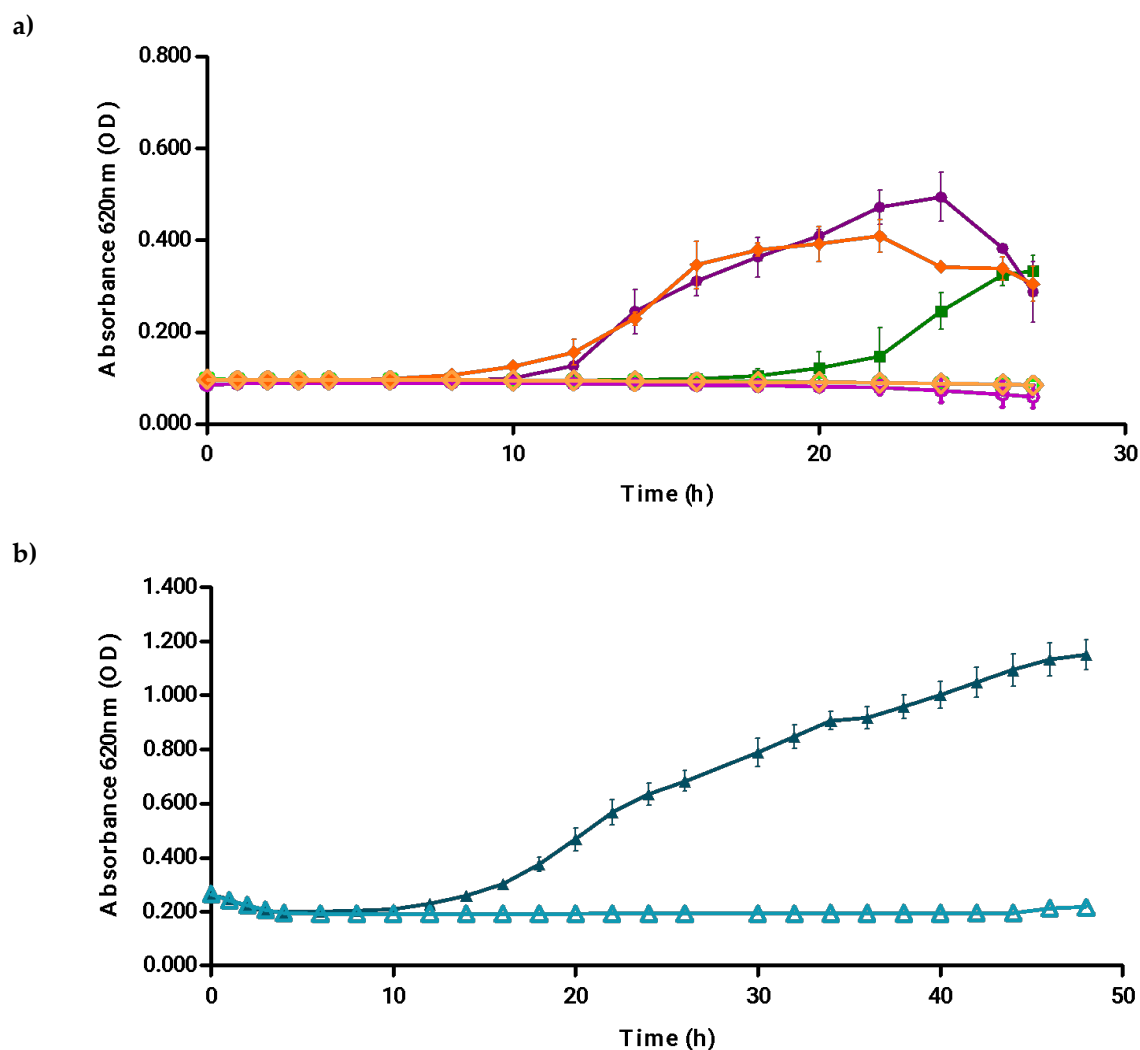

**Figure S2.** Growth over time of the selected indicator microorganisms *Listeria monocytogenes* (a) or *Lactilactobacillus parabuchneri* (b) measured by absorbance at 620 nm in the presence of cell-free supernatant (CFS) at the maximum non-inhibitory concentration and the minimum inhibitory concentration of each strain: (a) *Pediococcus acidilactici* CNTA 1059 at 1.25% (■) and 2.5% (□), *Lactiplantibacillus plantarum* at 2.5% (●) and 5% (○) and *Bacillus subtilis* at 0.625% (◆) and 1.25% (◇); (b) *Lactilactobacillus parabuchneri* CNTA 1374 at 0% (▲) and 0.15% (△) concentration. Data are mean  $\pm$  standard deviations (error bars) obtained from at least three independent experiments.

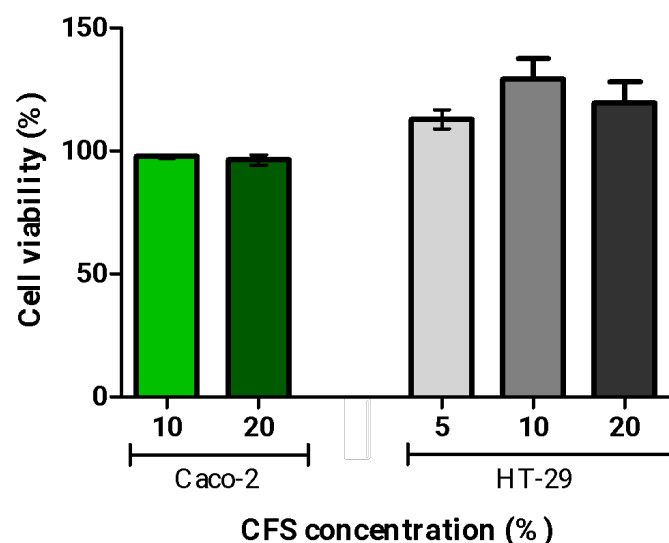

**Figure S3.** The cytotoxic effect of *Bacillus subtilis* CNTA 517 cell-free supernatant (CFS) on the cell viability of Caco-2 cell line (green colors) at different concentrations of CFS (10% and 20%) and on HT-29 cell line's (grey colors) viability at the CFS concentrations of 5%, 10% and 20%. Data are means  $\pm$  standard deviations (error bars) obtained from at least three independent experiments.

**Table S1.** Potential protective culture species from CNTA collection employed for the preliminary screening: number of strains of each species and origin of the isolation.

| Potential protective culture species (number of strains)     |                                                           |                                                  |
|--------------------------------------------------------------|-----------------------------------------------------------|--------------------------------------------------|
| <i>Bacillus subtilis</i> (16) (a, b)                         | <i>Lacticaseibacillus</i> spp. (24) (a, c, d, e, f, g, h) | <i>Lentilactobacillus</i> spp. (10) (c, d, e, g) |
| <i>Bifidobacterium longum</i> (1) (c)                        | <i>Ligilactobacillus</i> spp. (4) (c)                     | <i>Streptococcus</i> spp. (5) (c, g)             |
| <i>Bifidobacterium bifidum</i> (1) (d)                       | <i>Limosilactobacillus</i> spp. (14) (a, c, d, f, g, h)   | <i>Lactococcus</i> spp. (4) (a, c, g)            |
| <i>Bifidobacterium animalis</i> subsp. <i>Lactis</i> (7) (e) | <i>Loigolactobacillus</i> spp. (5) (a)                    | <i>Enterococcus</i> spp. (7) (a, g, i)           |
| <i>Bifidobacterium pseudocatenolatum</i> (2) (e)             | <i>Latilactobacillus</i> spp. (8) (a, h, i)               | <i>Oenococcus</i> sp. (1) (f)                    |
| <i>Lactiplantibacillus</i> spp. (39) (a, c, d, f, g, h)      | <i>Companilactobacillus</i> spp. (4) (h)                  | <i>Pediococcus</i> spp. (35) (a, d, e, f, h, i)  |
| <i>Levilactobacillus</i> spp. (20) (a, c, d, f, g, h)        | <i>Liquorilactobacillus</i> spp. (2) (a)                  | <i>Leuconostoc</i> spp. (19) (a, c, d, f, h, i)  |
| <i>Lactobacillus</i> spp. (7) (a, c)                         | <i>Furfurilactobacillus</i> sp. (1) (c)                   | <i>Weisella</i> spp. (12) (d, f)                 |

Origin of the isolation: a) Non-fermented vegetable product/subproduct, b) wasted paint, c) type or private collection, d) cryovial contamination, e) human feces, f) fermented vegetable product, g) dairy products, h) chorizo, i) cereals

**Table S2.** Potential protective culture microorganisms' growth conditions.

| Potential protective culture | Growth conditions |                   |                   |          |
|------------------------------|-------------------|-------------------|-------------------|----------|
|                              | Medium            | Temperature (° C) | Oxygen conditions | Time (h) |
| Lactic Acid Bacteria         | MRSb*             | 30                | Anaerobic         | 24       |
| Lactic Acid Bacteria         | MRSb*             | 37                | Anaerobic         | 24       |
| <i>Bifidobacterium</i> sp.   | MRSb*             | 37                | Anaerobic         | 24       |
| <i>Bacillus subtilis</i>     | TSB-YE**          | 37                | Aerobic           | 24       |

\*MRSb: Man, Rogosa and Sharpe Broth (Merck GmbH, Darmstadt, Germany)

\*\*TSB-YE: Tryptic Soy Broth – Yeast Extract (Scharlau, Barcelona, Spain)

**Table S3.** Pathogenic and spoilage microorganisms chosen as indicator strains and growth conditions.

| Pathogenic/ spoilage microorganisms                                            | Growth conditions |                   |                   |          |
|--------------------------------------------------------------------------------|-------------------|-------------------|-------------------|----------|
|                                                                                | Medium            | Temperature (° C) | Oxygen conditions | Time (h) |
| <i>Listeria monocytogenes</i> CECT 7467                                        | TSB-YE*           | 37                | Aerobic           | 18       |
| <i>Escherichia coli</i> O157:H7 DSMZ 19206                                     | TSB-YE*           | 37                | Aerobic           | 18       |
| <i>Salmonella enterica</i> subsp. <i>enterica</i> serovar Typhimurium CECT 443 | TSB-YE*           | 37                | Aerobic           | 18       |
| <i>Staphylococcus aureus</i> CECT 976                                          | TSB-YE*           | 37                | Aerobic           | 18       |
| <i>Bacillus cereus</i> CECT 193                                                | TSB-YE*           | 37                | Aerobic           | 18       |
| <i>Pseudomonas fluorescens</i> CNTA 571                                        | PDA**             | 25                | Aerobic           | 24       |
| <i>Rhodotorula mucilaginosa</i> DSMZ 18184                                     | PDA**             | 25                | Aerobic           | 24       |
| <i>Kluyveromyces marxianus</i> CNTA 1649                                       | PDA**             | 25                | Aerobic           | 24       |
| <i>Lentilactobacillus parabuchneri</i> DSMZ 5987                               | MRSa***           | 37                | Anaerobic         | 24       |

\*TSB-YE: Tryptic Soy Broth – Yeast Extract (Scharlau, Barcelona, Spain) (Tunçer and Karaçam, 2020)

\*\*PDA: Potato Dextrose Broth (Scharlau, Barcelona, Spain)

\*\*\*MRSa: Man, Rogosa and Sharpe Agar (Merck GmbH, Darmstadt, Germany)

**Table S4.** Antimicrobial activity of the cell-free supernatants (CFS) against pathogenic and spoilage strains with a well diameter of 7.20 mm. A bold typescript indicates the halo size achieved in the selected indicator microorganism.

| Indicator strain                                 | Halo diameter (mm)                        |                                               |                                           |                                   |
|--------------------------------------------------|-------------------------------------------|-----------------------------------------------|-------------------------------------------|-----------------------------------|
|                                                  | <i>Pediococcus acidilactici</i> CNTA 1059 | <i>Lactiplantibacillus plantarum</i> CNTA 600 | <i>Levilactobacillus brevis</i> CNTA 1374 | <i>Bacillus subtilis</i> CNTA 517 |
| <i>Listeria monocytogenes</i> CECT 7467          | <b>24.53 ± 0.21</b>                       | <b>22.35 ± 0.38</b>                           | 7.20 ± 0.00                               | <b>28.52 ± 0.08</b>               |
| <i>Staphylococcus aureus</i> CECT 976            | 7.20 ± 0.00                               | 7.20 ± 0.00                                   | 7.20 ± 0.00                               | 19.36 ± 0.07                      |
| <i>Salmonella</i> Typhimurium CECT 443           | 7.20 ± 0.00                               | 7.20 ± 0.00                                   | 7.20 ± 0.00                               | 7.20 ± 0.00                       |
| <i>Escherichia coli</i> DSMZ 19206               | 7.20 ± 0.00                               | 7.20 ± 0.00                                   | 7.20 ± 0.00                               | 7.20 ± 0.00                       |
| <i>Bacillus cereus</i> CECT 193                  | 7.20 ± 0.00                               | 13.36 ± 0.67                                  | 7.20 ± 0.00                               | 7.20 ± 0.00                       |
| <i>Pseudomonas fluorescens</i> CNTA 571          | 7.20 ± 0.00                               | 10.78 ± 0.05                                  | 7.20 ± 0.00                               | 7.20 ± 0.00                       |
| <i>Rhodotorula mucilaginosa</i> DSMZ 18184       | 7.20 ± 0.00                               | 7.20 ± 0.00                                   | 7.20 ± 0.00                               | 7.20 ± 0.00                       |
| <i>Lentilactobacillus parabuchneri</i> DSMZ 5987 | 7.20 ± 0.00                               | 7.20 ± 0.00                                   | <b>32.20 ± 0.04</b>                       | 7.20 ± 0.00                       |
| <i>Kluyveromyces marxianus</i> CNTA 1649         | 7.20 ± 0.00                               | 14.14 ± 0.12                                  | 7.20 ± 0.00                               | 7.20 ± 0.00                       |

**Table S5.** Antibiotic resistance genes identified in *Bacillus subtilis* CNTA 517 after screening of contigs after whole genome sequencing for antimicrobial resistance genes using the CARD database (results from the Resfinder database are not shown to avoid duplicities).

| Gene                          | % Coverage | % Identity | Resistance                                               |
|-------------------------------|------------|------------|----------------------------------------------------------|
| <i>Bacillus_subtilis_mprF</i> | 100.00     | 97.90      | Cationic peptides (eg defensins)                         |
| <i>vmlR</i>                   | 100.00     | 96.53      | Lincosamide, streptogramin, pleuromutilin, virginiamycin |
| <i>tet(L)</i>                 | 99.93      | 80.04      | Tetracycline                                             |
| <i>blt</i>                    | 100.00     | 99.00      | Fluoroquinolone, acridine dye                            |
| <i>aadK</i>                   | 99.77      | 98.83      | Aminoglycoside                                           |
| <i>bmr</i>                    | 100.00     | 98.97      | Fluoroquinolone, nucleoside, phenicol, acridine dye      |
| <i>ykkD</i>                   | 100.00     | 99.69      | Aminoglycoside, phenicol, tetracycline                   |
| <i>ykkC</i>                   | 100.00     | 99.70      | Aminoglycoside, phenicol, tetracycline                   |
| <i>tmrB</i>                   | 100.00     | 97.98      | Tunicamycin (nucleoside)                                 |
| <i>lmrB</i>                   | 100.00     | 99.51      | Lincosamide                                              |
| <i>mphK</i>                   | 100.00     | 99.13      | Macrolide                                                |
| <i>rphB</i>                   | 97.78      | 80.33      | Rifamycin                                                |

**Table S6.** Antimicrobial activity of the cell-free supernatants (CFS) after a heat treatment of 110 °C and 121 °C at different times, considering the 0.00 mm as 7.20 mm (no halo).

| Temperature (°C) | CFS                              | Halo diameter (mean ± SD mm) |              |              |              |              |
|------------------|----------------------------------|------------------------------|--------------|--------------|--------------|--------------|
|                  |                                  | 0 min                        | 10 min       | 60 min       | 90 min       | 120 min      |
| 110              | <i>P. acidilactici</i> CNTA 1059 | 16.73 ± 0.29                 | 15.59 ± 0.33 | 12.95 ± 0.37 | 11.93 ± 0.93 | 9.26 ± 0.93  |
|                  | <i>L. plantarum</i> CNTA 600     | 15.13 ± 0.38                 | 12.25 ± 0.19 | 11.47 ± 0.32 | 8.08 ± 0.03  | 4.66 ± 0.61  |
|                  | <i>L. brevis</i> CNTA 1374       | 25.00 ± 0.04                 | 22.54 ± 1.48 | 20.11 ± 0.64 | 19.75 ± 0.63 | 17.70 ± 0.20 |
|                  | <i>B. subtilis</i> CNTA 517      | 21.78 ± 0.08                 | 17.03 ± 0.61 | 11.42 ± 1.09 | 3.75 ± 0.45  | 0.00 ± 0.00  |
| 121              | <i>P. acidilactici</i> CNTA 1059 | 16.73 ± 0.29                 | 14.06 ± 0.42 | 11.70 ± 0.05 | 7.99 ± 0.19  | 2.98 ± 0.73  |
|                  | <i>L. plantarum</i> CNTA 600     | 15.13 ± 0.38                 | 10.49 ± 0.60 | 6.89 ± 0.02  | 2.97 ± 0.39  | 0.00 ± 0.00  |
|                  | <i>L. brevis</i> CNTA 1374       | 25.00 ± 0.04                 | 22.38 ± 0.45 | 18.63 ± 0.32 | 15.53 ± 0.20 | 13.83 ± 0.47 |
|                  | <i>B. subtilis</i> CNTA 517      | 21.78 ± 0.08                 | 16.07 ± 1.53 | 0.00 ± 0.00  | 0.00 ± 0.00  | 0.00 ± 0.00  |

**Table S7.** Lost antimicrobial activity of the cell-free supernatants (CFS) after heat treatments at 110 °C and 121 °C.

| CFS of                                        | Temperature (°C) | Equation           | R <sup>2</sup> |
|-----------------------------------------------|------------------|--------------------|----------------|
| <i>Pediococcus acidilactici</i> CNTA 1059     | 110              | $0.3432x + 1.333$  | 0.98           |
|                                               | 121              | $0.6105x + 1.9034$ | 0.95           |
| <i>Lactiplantibacillus plantarum</i> CNTA 600 | 110              | $0.4975x + 3.9658$ | 0.91           |
|                                               | 121              | $0.7545x + 10.853$ | 0.96           |
| <i>Levilactobacillus brevis</i> CNTA 1374     | 110              | $0.2098x + 4.1638$ | 0.92           |
|                                               | 121              | $0.3579x + 3.6514$ | 0.98           |
| <i>Bacillus subtilis</i> CNTA 517             | 110              | $0.7987x + 5.7009$ | 0.98           |
|                                               | 121              | $1.6050x + 4.6284$ | 0.99           |
